# Supplementary material
Source: publisher site journal article supplement (https://www.dovepress.com/get_supplementary_file.php?f=493980.docx)
Supplement: Supplementary file 1 [file get_supplementary_file.php]

Table S1 Information of hospitals included in this study

| Religion | Area | Hospital description |
| --- | --- | --- |
| East area | Shanghai | 11 tertiary hospitals, 5 secondary hospitals |
| Hangzhou | 12 tertiary hospitals |
| North area | Beijing | 10 tertiary hospitals, 3 secondary hospitals |
| Tianjin | 1 tertiary hospitals, 5 secondary hospitals |
| West area | Chengdu | 8 tertiary hospitals |
| South area | Guangzhou | 11 tertiary hospitals |

Table S2 Comparison of FNR use in different regions from 2013 to 2019

|  | ICU patients using FNRs | ICU patients not using FNRs | Total | χ2 | P |
| --- | --- | --- | --- | --- | --- |
| Shanghai | 7183a | 125049a | 132232 | 34409.222 | <0.001 |
| Hangzhou | 11533b | 301828b | 313361 |
| Beijing | 14984c | 185495c | 200479 |
| Tianjin | 9303d | 143539d | 152842 |
| Chengdu | 22445b | 585516b | 607961 |
| Guangzhou | 26067e | 151366e | 177433 |
| Total | 91515 | 1492793 | 1584308 |

Each subscript letter denotes a subset of Region categories whose column proportions do not differ significantly from each other at the 0.05 level.
